# Supplementary material
Source: publisher site journal article supplement (https://www.spandidos-publications.com/3619/downloadSupplementary)
Supplement: Supplementary file 1 [file downloadSupplementary]

Figure S1. Extracellular vesicles were incubated with different antibody-coated capture beads. The different capture beads could be distinguished by their FITC and PE fluorescence. The captured vesicles were then stained by APC-conjugated anti-CD9, anti-CD63 and anti-CD81 antibodies. (A) FSC-A/SSC-A, selection of the single beads while excluding cross-linked beads. PE-A/APC-A, some populations of single beads showed APC-staining, indicating that extracellular vesicles were bound to those beads. FITC-A/PE-A, the specific bead subsets were selected and the APC-MFI was read out for each of the 39 capture bead subsets. The MFI values were corrected for the background signal (beads with buffer only) before normalization towards the average of anti-CD9, anti-CD63 and anti-CD81 beads. (B) The control (MACSplex buffer only). MFI, median fluorescence intensity.

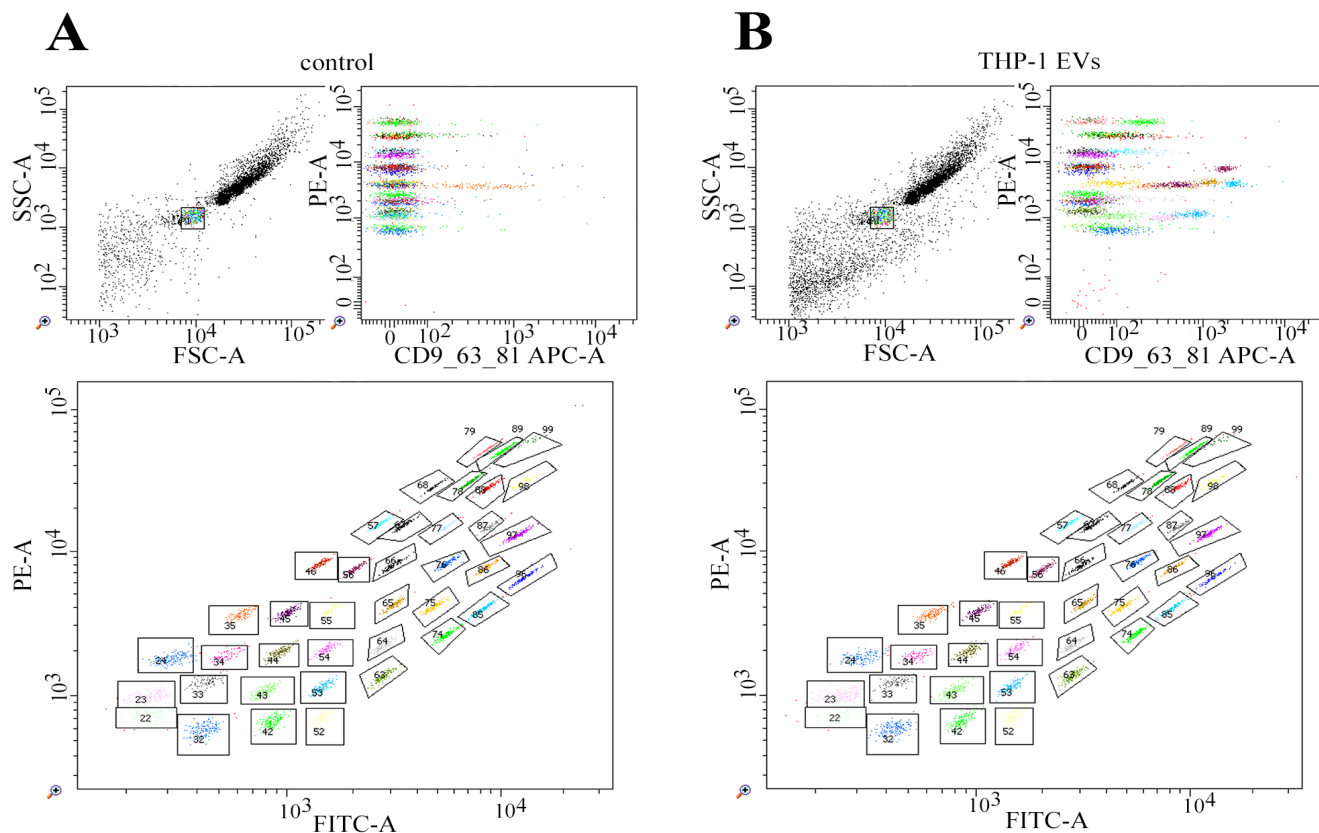

C

| surface protein | gate no.   | median APC anti-CD9/63/81 |           |
|-----------------|------------|---------------------------|-----------|
|                 |            | blank                     | THP-1 EVs |
|                 | <i>all</i> | 23                        | 107       |
|                 | <i>P1</i>  | 13                        | 63        |
| <b>CD3</b>      | 22         | 24                        | 77        |
| <b>CD4</b>      | 23         | 11                        | 368       |
| <b>CD19</b>     | 24         | 10                        | 13        |
| <b>CD8</b>      | 32         | 6                         | 83        |
| <b>MHC-II</b>   | 33         | 7                         | 21        |
| <b>CD56</b>     | 34         | 26                        | 26        |
| <b>CD105</b>    | 35         | 403                       | 352       |
| <b>CD2</b>      | 42         | 13                        | 68        |
| <b>CD11c</b>    | 43         | 10                        | 89        |
| <b>CD25</b>     | 44         | 14                        | 17        |
| <b>CD49e</b>    | 45         | 10                        | 507       |
| <b>ROR1</b>     | 46         | 10                        | 33        |
| <b>CD209</b>    | 52         | 5                         | 17        |
| <b>CD9</b>      | 53         | 14                        | 781       |
| <b>SSEA4</b>    | 54         | 24                        | 27        |
| <b>MHC-I</b>    | 55         | 12                        | 78        |
| <b>CD63</b>     | 56         | 13                        | 1821      |
| <b>CD40</b>     | 57         | 10                        | 99        |
| <b>CD62P</b>    | 63         | 10                        | 12        |

| surface protein      | gate no. | median APC anti-CD9/63/81 |           |
|----------------------|----------|---------------------------|-----------|
|                      |          | blank                     | THP-1 EVs |
|                      |          |                           |           |
| <b>CD11c</b>         | 64       | 8                         | 66        |
| <b>CD81</b>          | 65       | 12                        | 1183      |
| <b>MCSP</b>          | 66       | 11                        | 14        |
| <b>CD146</b>         | 67       | 13                        | 7         |
| <b>CD41b</b>         | 68       | 14                        | 123       |
| <b>CD42a</b>         | 74       | 14                        | 15        |
| <b>CD24</b>          | 75       | 10                        | 83        |
| <b>CD86</b>          | 76       | 14                        | 23        |
| <b>CD44</b>          | 77       | 11                        | 186       |
| <b>CD326</b>         | 78       | 37                        | 57        |
| <b>CD133/1</b>       | 79       | 19                        | 26        |
| <b>CD29</b>          | 85       | 10                        | 2277      |
| <b>CD69</b>          | 86       | 6                         | 8         |
| <b>CD142</b>         | 87       | 10                        | 17        |
| <b>CD45</b>          | 88       | 11                        | 130       |
| <b>CD31</b>          | 89       | 14                        | 203       |
| <b>REA Control</b>   | 96       | 8                         | 14        |
| <b>CD20</b>          | 97       | 12                        | 29        |
| <b>CD14</b>          | 98       | 14                        | 82        |
| <b>mlgG1 Control</b> | 99       | 14                        | 21        |
